1 Article

# 2 The Autonomic Nervous System Differentiates 3 Between Levels of Motor Intent and Hand 4 Dominance

5 Jihye Ryu<sup>1</sup>, Elizabeth Torres<sup>2\*</sup>

6 <sup>1</sup> Psychology Department, Rutgers University Center for Cognitive Science, Rutgers University, Piscataway,  
7 NJ 08854, USA; jihye.ryu@rutgers.edu

8 <sup>2</sup> Psychology Department, Rutgers University Center for Cognitive Science, Computational Biomedicine  
9 Imaging and Modeling Center at Computer Science Department, Rutgers University, Piscataway, NJ 08854

10

11 \* Correspondence: ebtorres@psych.rutgers.edu; Tel.: +1-732-208-3158

12 Received: date; Accepted: date; Published: date

## 13 Abstract:

14 While attempting to bridge motor control and cognitive science, the nascent field of embodied  
15 cognition has primarily addressed intended, goal-oriented actions. Less explored however, have  
16 been unintended motions. Such movements tend to occur largely beneath awareness, while  
17 contributing to the spontaneous control of redundant degrees of freedom across the body in motion.  
18 We posit that the consequences of such unintended actions implicitly contribute to our autonomous  
19 sense of action ownership and agency. We question whether biorhythmic activities from these  
20 motions are separable from those which intentionally occur. Here we find that fluctuations in the  
21 biorhythmic activities of the nervous systems can unambiguously differentiate across levels of  
22 intent. More important yet, this differentiation is remarkable when we examine the fluctuations in  
23 biorhythmic activity from the autonomic nervous systems. We find that when the action is intended,  
24 the heart signal leads the body kinematics signals; but when the action segment spontaneously  
25 occurs without instructions, the heart signal lags the bodily kinematics signals. We posit that such  
26 differentiation within the nervous system, may be necessary to acquire the sense of action  
27 ownership, which in turn, contributes to the sense of agency. We discuss our results while  
28 considering their potential translational value.

29 **Keywords: embodied cognition, agency, action ownership, network analysis, motor variability,**  
30 **motor control, voluntary motion, precision medicine**

31

---

## 32 1. Introduction

33 The field of embodied cognition (EC) has provided a powerful theoretical framework amenable  
34 to bridge the gap between research probing our mental states and research investigating our physical  
35 actions [1-3]. Indeed, within the framework of EC, the construct of agency conceived as a cognitive  
36 movement phenomenon [4-6], may provide a way to finally connect the disparate fields of cognitive  
37 science and motor control. An important component of agency is action ownership [5, 7, 8], *i.e.* the  
38 sense that sensory consequences of the actor's action are intrinsically part of the actor's inner  
39 sensations. When the actor owns the action, s/he has full control over those sensations that are  
40 internally self-generated and self-monitored by the actor's brain, and yet extrinsically modulated by  
41 external sensory goals. A critical aspect of this internal-external loop is the identification of the level  
42 of actor's intent, and its differential contribution to the action's intended and unintended sensory  
43 consequences.

44 In recent years, a body of knowledge has increased our understanding on the sensory  
45 consequences derived from intentional actions, as such action components deliver an overall sense  
46 of agency [9, 10]. Less explored however, have been parts of the action that are unintended, or that  
47 transpire spontaneously and largely beneath awareness. Such actions' components exist at the  
48 involuntary and at the autonomic levels of neuromotor control (Figure 1). They do not require explicit  
49 instructions or precisely defined external goals, yet they too contribute to the differentiation of levels  
50 of intent in our actions [11, 12]. More importantly, at the cognitive level of decision making, these  
51 unintended movements contribute to the acquisition of decision accuracy, within the context of motor  
52 learning induced by different cognitive loads [13, 14].

53 At the motor control level, autonomous and spontaneous movements are important to develop  
54 a sense of action ownership in the face of motor redundancy [15]. They require the coordination of  
55 many degrees of freedom (DoF) across the body. Thus, as we produce fluid and timely goal-oriented  
56 actions, kinematic synergies self-emerge and dynamically recruit and release the bodily DoFs,  
57 according to task demands [16-18]. Conscious decisions generating movements that attain external  
58 goals take place as the brain interweaves deliberate and spontaneous movement segments. Such  
59 segments in our complex actions gracefully build an ebb and flow of intended actions and sensory  
60 consequences [11]. Some of these sensations that voluntary movements give rise to [19], return to the  
61 brain as intentional feedback, thought to contribute to our internal models of action dynamics [20,  
62 21]. This form of volitionally controlled kinesthetic reafference cumulatively helps us build accurate  
63 predictions of those intended sensory consequences [19], while other unintended movements return  
64 to the brain as spontaneous reafference, providing contextual cues that support motor learning,  
65 motor adaptation and action generalization across different situations [11].

66 One informative aspect of this ebb and flow of intent and spontaneity in our actions is the  
67 fundamental differences that emerge in the geometric features of the positional trajectories that the  
68 moving body describes [22-24]. When the motions are intended, geometric invariants derived from  
69 these trajectories emerge and remain robust to changes in speed dynamics [16, 23-27]. In contrast,  
70 trajectories from unintended motions produce different signatures of motor variability bound to  
71 return to the brain as spontaneous feedback. These internal sensations help us define contextual  
72 variations emerging from external environmental cues [11, 12]. These may include for example,  
73 changes in visual and auditory inputs, such as shifts in lighting conditions, or modulations in sound  
74 and music [12, 28]. The geometry of these spontaneous movements' trajectories dramatically changes  
75 with fluctuations in the movements' dynamics. Changes in speed [16, 23-27] or mass [12] affect their  
76 motor variability in fundamentally different ways (if we compare the signatures of variability derived  
77 from the spontaneous samples to those derived from deliberately staging the same movement  
78 trajectories [12, 25].) More importantly, the fluctuations in the motor variability of these spontaneous  
79 motions can forecast symptoms of Parkinson's disease before the onset of high severity [29, 30]. They  
80 have also aided in evoking the sense of action ownership and agency in young pre-verbal children  
81 [31]. For these reasons, here we posit that deliberate and spontaneous segments of complex actions  
82 ought to differentially contribute to our sense of action ownership and to our overall sense of agency.  
83 To examine this proposition, we follow a phylogenetically orderly taxonomy of the nervous systems'  
84 maturation (Figure 1B) and examine all levels of neuromotor control – from autonomic to deliberate  
85 – necessary to coordinate voluntary motions (Figure 1A).

86 More specifically, since autonomic systems are vital to our survival and wellbeing, they may  
87 remain impervious to subtle distinctions between deliberate and spontaneous motions that take place  
88 across the body, as the end effector completes goal-directed actions. Here we explore the interplay  
89 between autonomic signals and voluntary motor control in actions that integrate deliberate and  
90 spontaneous motions across the body. We use a new unifying statistical framework for  
91 individualized behavioral analyses and network connectivity analyses and offer a quantitative  
92 account of how these movement classes contribute to the overall embodied sense of agency.



93

94 **Figure 1. Defining quantitative aspects of agency for the study of embodied cognition (A)**  
95 Phylogenetically orderly taxonomy of nervous system functions involving different levels of  
96 voluntary control (intent) ranging from deliberate to spontaneous movement segments, to  
97 involuntary motions and autonomic control. Multi-layered signals contributing from each of these  
98 layers are proposed to differentially contribute to the sense of action ownership and to the overall  
99 sense of agency via sensory consequences preceded by different levels of intent. (B) Contributions of  
100 the central and peripheral nervous systems, including the autonomic nervous system (ANS), can be  
101 tracked in a closed loop that helps the autonomous realization of intended thoughts into physical  
102 actions under volitional control. (C) Network connectivity analyses of kinematics and heart  
103 biorhythmic signals encompassing these levels of control enable the study of agency through objective  
104 quantitative methods.

## 105 2. Materials and Methods

### 106 2.1. Experimental Design

#### 107 2.1.1. Participants

108 Nine undergraduate students (2 males and 7 females) between the ages of 18 and 22 years were  
109 recruited from the Rutgers human subject pool system. Two were left-handed and seven were right-  
110 handed, and all had normal or corrected-to-normal vision. All participants received credit for their  
111 participation, and provided informed consent, which was approved by the Rutgers University  
112 Institutional Review Board. The study took place at the Sensory Motor Integration lab at Rutgers  
113 University.

114 During the experiment, movement kinematics and heart signals were recorded from each  
115 participant. However, one participant's recording had too much noise (i.e., inaccurate sensor position  
116 with error larger than 10cm), so we excluded this participant's data in the analysis. For that reason,  
117 eight participants' motor and heart signals were analyzed.

#### 118 2.1.2. Sensor Devices

119 Motion capture system (kinematics data): Fifteen electromagnetic sensors sampling at a frequency of  
120 240 Hz (Polhemus Liberty, Colchester, VT) were attached to the participant's upper body in the  
121 following locations: center of the forehead, thoracic vertebrae T7, right and left scapula, right and  
122 left upper arm, right and left forearm, non-dominant hand, and the dominant hand's index finger .  
123 These sensors were secured with sports bands to allow unrestricted movement during the recordings.

124 Motor signals were recorded in real-time by Motion Monitor (Innovative Sports Training Inc.,  
125 Chicago, IL) software, where the participant's body was constructed by a biomechanical model, and  
126 movement data were preprocessed by an embedded filtering algorithm of the software, providing  
127 the position and kinematics of each sensor.

128 Electrocardiogram (heart data): Three sensors of electrocardiogram (ECG) from a wireless Nexus-10  
129 device (Mind Media BV, The Netherlands) and Nexus 10 software Biotrace (Version 2015B) were used  
130 to record heart activity. At a sampling rate of 256Hz, the sensors were placed across the chest  
131 according to a standardized lead II method.

### 132 2.1.3. Experimental procedure

133 Participants sat at a desk facing an iPad tablet (Apple, Cupertino, CA), which was used to  
134 display stimuli during the experiment, and participants responded by touching the tablet screen. The  
135 tablet display was controlled with an in-house developed MATLAB (Release 2015b, The MathWorks,  
136 Inc., Natick, Massachusetts, United States) program and TeamViewer application (Germany).

137 As shown in Figure 2, for each trial, the participant was presented with a circle on the tablet  
138 screen. This circle served as a prompt for the participant to touch the tablet screen within five seconds.  
139 After the touch, either 100ms, 400ms, or 700ms elapsed, and the participant heard a tone at 1000Hz  
140 for 100ms. Then, on the tablet screen, the participant was presented with a sliding scale, ranging from  
141 0 to 1 (second), to indicate how long he/she perceived the time elapsed between the touch and the  
142 tone. The response was to be made within five seconds upon the display of the sliding scale. The five  
143 seconds time-window was considered enough for the participant to provide a response, as it took  
144 approximately 1 s to touch the screen and retract the hand back to its original position. There was a  
145 total of three conditions – control, low cognitive load, high cognitive load - and each condition  
146 consisted of 60 trials. In the control condition, the participant simply performed each trial with no  
147 additional task; under the low cognitive load condition, the participant performed each trial while  
148 repeatedly counting forward 1 through 5; under the high cognitive load condition, they counted  
149 backwards from 400 subtracting by 3 while they performed each trial. Participants counted forward  
150 and backward at their own comfortable pace, and they took breaks in between each condition. The  
151 experiment set up took about 30 minutes, and the recording took about 40 minutes.

## 152 2.2. Statistical Analysis Overview

### 153 2.2.1. Preprocessing

154 In this study, we extracted the kinematics (i.e., linear speed, angular acceleration) and heart data  
155 during time segments when the participant made a pointing motion towards the circle presented on  
156 the tablet screen; and combined them across the three conditions. As a result, we analyzed the  
157 kinematics and heart data recorded while the participant made 180 pointing motions (less any trials  
158 that were deemed noisy; the most trials we excluded per participant due to instrumentation noise  
159 were 12 trials).

160 To analyze the ECG and kinematics data in tandem, we up-sampled the kinematics data from  
161 240Hz to 256Hz using piecewise cubic spline interpolation. Note, the ECG signals were not  
162 synchronized with the kinematics data but were manually time stamped at the start and end of each  
163 experimental condition. For that matter, we expect a presence of lag between the two modes of signals  
164 – kinematics and ECG – but the lag would not exceed 1 second.

165 To exclude effects of muscle motion from the ECG heart data, we bandpass filtered the data with  
166 Butterworth IIR for 5-30Hz at 2nd order. This filter was effective in identifying QRS complexes and  
167 extracting R-peaks in previous studies [13, 32]. Here, the filter excluded the dominant frequency  
168 range where typical kinematics signals are present (see Appendix Figure A1). We performed our  
169 analyses using both filtered and non-filtered EKG data and found similar trends and patterns.  
170 However, the paper only presents the results from using the filtered data, as it is a better reflection of  
171 the heart activity.

## 172 2.2.2. Data analysis structure

173 We used the rationale in Figure 1 to structure our analyses, with a focus of two main axes  
174 denoting the level of motor intent and awareness that the brain may have during complex tasks  
175 (Figure 3A). More precisely, one axis explores possible differentiations between time segments of the  
176 pointing movements that are deliberately aimed at an external target (forward/high motor intent) vs.  
177 segments that are consequential to the deliberate ones (backward/low motor intent). The latter may  
178 occur when the hand retracts back to rest, or when after touching the target the person transitions the  
179 hand in route to another goal-directed motion. These segments have been studied in our lab across  
180 very complex motions in sports (boxing, tennis) and in the performing arts (ballet, salsa dancing). We  
181 have coined them spontaneous movements and discovered that they have precise signatures that  
182 distinguish them from the deliberate ones. For this reason, we hypothesized here that these  
183 spontaneous motions would have different stochastic signatures or be differentially expressed in  
184 relation to the deliberate ones.



185

186 **Figure 2. Experimental assay and instrumentation setup (A)** Experimental procedure. In a single  
187 trial, the participant was presented with a display screen as shown on the top panel. During the first  
188 5 seconds, the participant was presented with a circle as a prompt to touch the circle on the screen.  
189 After the touch, the participant heard a tone. The duration between the touch and the tone was  
190 randomly set to be 100ms, 400ms, or 700ms. In the next 5 seconds, the participant was presented  
191 with a sliding scale, where s/he indicated how long the time was perceived to have elapsed between the  
192 touch and the tone, by touching the corresponding number on the scale. For each trial, the participant  
193 made two pointing gesture – one to touch the circle and another to indicate their time estimation on  
194 the sliding scale. Such pointing gesture was composed of a forward reaching segment (red) and a  
195 backward retracting segment (blue), as shown in the bottom panel. **(B)** Motion capture sensor  
196 positions. The sensors were attached on the following body parts: center of the forehead, thoracic  
197 vertebrae T7, right and left scapula, right and left upper arm, right and left forearm, non-dominant  
198 hand, and the dominant hand's index finger. **(C)** Snapshot of the experiment. During the experiment,  
199 the participant was seated in front of the tablet screen to perform the tasks, and wired sensors were  
200 secured with athletic tape.

201 The other axis explores possible contributions of body parts that are not directly related to the  
202 end effector (the dominant hand) performing the pointing task. We reasoned that there may be higher  
203 motor intent devoted to the performing (dominant) hand of the participant than to the non-dominant

204 side of the body. Furthermore, we explored how other body parts (also co-registered within the  
205 sensors' network) contributed to the overall performance of this task.

206 These two axes were explored at the voluntary level of motor control interleaving deliberate  
207 goal-directed (forward) actions and spontaneous (backward) segments of the full pointing loop. We  
208 also included in our analyses the autonomic level of control in the taxonomy of Figure 1A. And to  
209 that end, we co-registered the heart activity and incorporated it into the bodily kinematics activity  
210 (Figure 3B). We next explain how to overcome challenges in sensors' data fusion from disparate  
211 systems along with new approaches to analyze these multi-modal data.



212

213 **Figure 3. Overview of analytics pipeline.** (A) Behavioral assay to quantify ranges of motor intent  
214 along two axes to highlight externally and internally defined goals. Along the former, motions are  
215 classified across time based on the end-effector's movement, ranging from backward-spontaneous  
216 (lower motor intent) to forward-deliberate (higher motor intent) motions. Along the other axis,  
217 motions are classified across locations of the body, based on the proximity to the end-effector, from  
218 non-dominant side of the body parts (lower motor intent) to the dominant side including the end-  
219 effector (higher motor intent). Note, the two axes are not necessarily orthogonal as the schematics  
220 imply. (B) Two types of network analyses were made. Within the kinematics network, kinematics  
221 data served to compare patterns of variability from movement segments of higher level of intent  
222 (deliberately aimed at the goal) and movement segments with lower level of intent (spontaneous  
223 retractions of the hand to rest, without instructions), including as well comparison of patterns from  
224 the dominant and non-dominant parts of the body. Within the kinematics-heart network, a similar  
225 comparison was made, with a layer of autonomic function added, using signals from the EKG sensors.  
226 (C) For the spatial domain of connectivity analysis, raw biophysical data (biorhythms) co-registered  
227 from multiple layers of the peripheral and autonomic nervous systems were converted to MMS, and  
228 used to compute pairwise similarity/synchronicity metrics to build adjacency matrices to represent  
229 weighted / undirected graphs. For the temporal domain, the raw biophysical data were directly used  
230 to build adjacency matrices. For both domains, with the obtained adjacency matrices, network  
231 connectivity analyses combined with non-linear dynamical systems approaches were used to identify  
232 self-emerging kinematic synergies and various indexes to enable objective quantification of the  
233 embodied cognition phenomena.

234 2.2.3. Challenges of multilayered data with non-linear dynamics and non-normally distributed  
235 parameters

236 Disparate physical units: Different instruments to assess biorhythms from different layers of the  
237 nervous systems (i.e., kinematics vs. EKG) output biosignals with different physical units (e.g. m/s  
238 from the kinematics speed, mV from the EKG). This poses a challenge to integrate these signals and  
239 examine their interrelations across these layers.

240 Allometric effects: Another issue is that when examining such data from different participants with  
241 different anatomical sizes, allometric effects may confound our results. This is so because *e.g.* the  
242 speed ranges that a person attains depend on the length of the arm. Longer arms tend to broaden the  
243 ranges of speed and contribute to the distribution of speed values that the person attains in any given  
244 experiment. As such, we need to account for these possible allometric effects.

245 Assumption of normality: Another related matter to the ranges of speed and their distributions is  
246 that they vary from person to person according to multiple factors (*e.g.* age, body mass, sex, fitness,  
247 etc.) [32]. These variations result in probability distributions with heavy tails, which are incompatible  
248 with common assumptions of normality in the literature. When the effects of the task, or the inherent  
249 motor noise in the system, are such that most values related to the speed distribute more densely  
250 toward the left of the frequency histogram (*e.g.* in autism exponentially distributed maximum speed  
251 amplitude is common [33]), assuming normality may incur in spurious results. This is so, because  
252 speed ranges from 0 to some limiting value for each person (the maximum speed that the person can  
253 reach before damaging the joints). As such, when one obtains the mean +/- two standard deviation  
254 values to approximate standard error bars (which is very common in the motor control literature)  
255 while summarizing the statistical features of the data, the data may fall in the negative speed ranges  
256 (which is physically absurd).

257 Assessing similarity in probability space: Going beyond significant hypothesis testing models, one  
258 may need to assess the differences between probability distributions. To that end, one may need a  
259 proper similarity metric. Yet, when our data represents points in probability space, and the  
260 distributions are not symmetric, it is challenging to assess their similarity in a consistently proper  
261 way. Measures like the Fisher information metric are designed to compare symmetric distributions  
262 and the Kullback-Leibler divergence is computed asymmetrically between distributions (one-sided).  
263 We would like to have a proper (two-sided) distance metric to assess change and its rate when points  
264 are related to non-symmetric continuous probability density functions, or to their discrete  
265 approximations.

266 Degrees of freedom across intent levels of motor control: Multiple locations of the grid of sensors, co-  
267 registering biorhythms from different nervous systems, contribute differently to the overall behavior  
268 of the system. Some may be more directly related to action success, while others may provide  
269 support. Separating the bodily region within a kinematics-heart network can be challenging because  
270 of the non-linear dynamics of the interactive systems. Yet, most methods assume or impose local  
271 linearities to model such phenomena. Here we propose to approach this problem by treating the grid  
272 of sensors as a dynamically evolving weighted interconnected network, whereby we track self-  
273 emerging modules informing us of spontaneous synergies and connectivity patterns.

#### 274 2.2.4. Some solutions to the Challenges

275 New data type for disparate physical units: We have created a data type called the micro-movement  
276 spikes (MMS), which is a unitless, standardized waveform derived from the moment to moment  
277 fluctuations in the raw data peaks' amplitude and / or timing. This data type extracts the fluctuations  
278 in amplitude and/or timing of any waveform with peaks and valleys (*e.g.* time series of speed values  
279 or kinematic related values derived from them). To that end, we obtain the empirically estimated  
280 moments from the peaks in the raw waveform. We then build a new waveform that can be  
281 normalized according to various criteria. This new waveform is then unitless and refers to a relative  
282 quantity (rather than to an absolute quantity).

283 Data standardization to account for allometric effects: The Anthropology and Paleontology literature  
284 has several solutions to address comparative data that may come from different bone sizes across *e.g.*  
285 different humanoids [34, 35]. Equation (1) provides an example of standardization to scale values  
286 derived from any waveform with peaks and valleys, which can be derived *e.g.* from data series with  
287 different physical units, from effectors of different sizes:

288 
$$\text{StandardizedPeak} = \frac{\text{LocalPeak}}{\text{LocalPeak} + \text{Avr}g_{\text{min-to-min}}} \quad (1)$$

289 The standardized quantities are in the real-valued [0,1] interval. They are coined MMS  
290 amplitudes and treated as a continuous random process. We have characterized several complex  
291 behaviors from various layers of the nervous systems using the MMS, and expressed them in two  
292 forms: (1) without preserving the original frames of the data, *i.e.* just focusing on the MMS amplitude  
293 fluctuations and (2) conserving the original frames, in which case, we would 0-pad those that are not  
294 spikes, or preserve their values as additional gross data contributing to the phenomena in question.  
295 Either way, these fluctuations ought not be averaged out by assumptions of normality. Whereas in  
296 the extant literature these fluctuations are considered noise, or superfluous, here we treat them as  
297 important signal.

298 Distribution-free approach to counter current assumption of normality: We do not assume normality  
299 in the data. Instead, we gather enough data to empirically estimate the best family of probability  
300 distributions that fits the data. To that end, we here use maximum likelihood estimation (MLE) with  
301 95% confidence intervals and seek the best continuous family that fits our data.

302 Distance metric to assess similarity in probability space: We here introduce the use of the Earth  
303 Mover's Distance Metric (EMD) [36-39] to approximate (using the frequency histograms of the MMS  
304 amplitudes) the stochastic shifts in probability space that occur for different movement types. This is  
305 an appropriate similarity metric that allows us to examine the extent to which different levels of  
306 motor control change the stochastic patterns. We briefly describe it below:

307 The EMD, also known as the Kantorovich-Wasserstein distance [40], measures the distance  
308 between two discrete probability distributions. Given two discrete distributions  $P = \{(p_1, w_{p_1}), \dots$   
309  $(p_m, w_{p_m})\}$  [13, 14], where  $p_i$  is the cluster representative and  $w_{p_i}$  is the weight of the cluster; and  $Q =$   
310  $\{(q_1, w_{q_1}), \dots (q_n, w_{q_n})\}$ , EMD computes how much mass is needed to transform one distribution into  
311 another. Defining  $D [d_{ij}]$  as the ground distance matrix, where  $d_{ij}$  is the ground distance between  
312 clusters  $p_i$  and  $q_j$ , and  $F = [f_{ij}]$  with  $f_{ij}$  as the flow between  $p_i$  and  $q_j$ ; EMD is computed by minimizing  
313 the overall cost of such:

314 
$$\text{Work}(P, Z, F) = \sum_{i=1}^m \sum_{j=1}^n d_{ij} f_{ij}$$

315 As there are infinite ways to do this, the following constraints are imposed to yield EMD values:

316 
$$f_{ij} \geq 0 \quad 1 \leq i \leq m, 1 \leq j \leq n$$

317 
$$\sum_{j=1}^n f_{ij} \leq w_{p_i} \quad 1 \leq i \leq m$$

318 
$$\sum_{i=1}^m f_{ij} \leq w_{q_j} \quad 1 \leq j \leq n$$

319 
$$\sum_{i=1}^m \sum_{j=1}^n f_{ij} = \min(\sum_{i=1}^m w_{p_i}, \sum_{j=1}^n w_{q_j})$$

320 
$$\text{EMD}(P, Q) = \frac{\sum_{i=1}^m \sum_{j=1}^n d_{ij} f_{ij}}{\sum_{i=1}^m \sum_{j=1}^n f_{ij}}$$

321 Network connectivity analyses to assess degrees of freedom recruitment across modalities of motor  
322 control: We use graph theory to examine the inter-relations across the nodes of the multilayered  
323 kinematics-heart network. To that end, we derive an adjacency metric of pairwise quantities  
324 reflecting the cross-correlation between any pair of nodes in the grid. We then construct weighted  
325 directed networks and borrow connectivity metrics from brain-related research. We extend these  
326 methods to represent the peripheral network using the bodily biorhythms from multiple layers of the  
327 nervous systems' functioning, spanning from voluntary to autonomic (Figure 1A).

### 328 2.2.5. Choice of kinematics parameter

329 The recording of positions over time across 10 upper body parts allows us to estimate two  
330 aspects of the biorhythmic data: *spatial* and *temporal* aspects, both of which are critical to characterize  
331 proper coordination and control. A parameter encompassing both aspects is the velocity. The  
332 derivative of position over time creates vector fields with direction and extent. Each point in the field  
333 (along the velocity trajectory) occurs in time and moves in space.

334 To assess spatial components, we use the scalar speed (distance traveled per unit time, where  
335 the unit time is taken constantly at the rate of 240 frames per second). We use Euclidean norm to  
336 compute the length of the velocity vector at each unit time, thus quantifying the rate of change in  
337 position per unit time – the linear speed (*m/s*). Likewise, we use the orientation data from each sensor  
338 and obtain the angular velocity from the rotations of each body part. Using appropriately the  
339 quaternion representation of rotations and the Euclidean metric to quantify the magnitude of the  
340 angular velocity vector, we obtain the angular speed (*deg/s*). These waveforms derived from the first  
341 order change are useful, but at the time scale (~1/2 hour) of our experimental assay, they provide  
342 fewer peaks per trial than waveforms derived from the second order change (*i.e.*, linear acceleration  
343 (*m/s<sup>2</sup>*) or angular acceleration (*deg/s<sup>2</sup>*)).

344 As we need many spikes for our distribution-fitting and stochastic analyses, we used the angular  
345 acceleration kinematics data. Note, it is possible to have had participants perform more trials to  
346 obtain a larger number of spikes using the linear speed; however, this would fatigue the participants  
347 as the length of the experiment is around 70 minutes (inclusive of 40 minutes for set up). For that  
348 reason, within this amount of time, it was ideal to use the angular acceleration as our kinematic  
349 parameter of interest. This choice of parameter to analyze the stochastic patterns of the moment by  
350 moment fluctuations in signal amplitude (*i.e.* the spatial component of our analysis) provides tighter  
351 confidence interval in the empirical estimation of the best probability distribution family fitting the  
352 data.

353 We also examined temporal components of the data. To that end, we used the linear speed  
354 patterns and the cross-correlation function. We extended our analyses to different kinematics  
355 parameters, and while they all showed similar patterns and trends, we found the linear speed to best  
356 characterize the differing patterns of motor intent. For that reason, we present the results of the  
357 temporal analyses involving cross-correlation based network connectivity patterns using the linear  
358 speed as our waveform of choice (Figure 3C).

### 359 2.3. Data analysis on kinematics network connectivity

360 As a first step, we separated the kinematics data obtained from all 10 body parts, using the start  
361 and end time of the dominant hand making a forward-deliberate motion, and the hand making a  
362 backward-spontaneous motion (Figure 4A). This is possible to do (automatically) because (1) the  
363 speed is near 0 at the onset of the motion towards the target; (2) the distance to the target  
364 monotonically decreases and once again the hand pauses at the target at near 0 speed. As the  
365 deliberate (forward) segment is completed, the speed rises again away from 0 and the distance to the  
366 target increases as the hand follows the backward segment of the full pointing loop. The two  
367 segments can be automatically differentiated also because the deliberate (forward) one is less variable  
368 than the spontaneous (backward) one [11, 29, 34, 42].

369 For the connectivity analysis centered on spatial aspects of the signal amplitude, we pooled the  
370 angular acceleration data from each body part and extracted the MMS amplitudes (referred to as  
371 MMS from hereon). We then built frequency histograms of the MMS and explored several families  
372 of PDFs using MLE. The continuous family of Gamma PDFs yielded the best fit (Figure A2) and  
373 served to provide the noise to signal ratio (NSR; computed to equal the Gamma scale parameter) for  
374 each body part (Figure 4B, 4D-F). These were then visualized as node size in the schematics of the  
375 network in Figure 4K across different motor intent levels.

376 To characterize the connectivity of 2 body parts, we took the pairwise absolute difference  
377 between angular acceleration and based on the obtained absolute difference time series, computed  
378 the corresponding MMS. We then fitted the Gamma scale parameter (*i.e.*, NSR) (Figure 4C, 4D-F),

379 which were visualized as edges in the schematics of the network in Figure 4K. The intuition behind  
380 taking the absolute difference in angular acceleration time series from two body parts is that this  
381 reflects the change in positional distance between those two body parts, and thus represents the  
382 connectivity (physical distance) between those two. The NSR values were then compared between  
383 different movement segments (i.e., forward vs. backward) and different hand dominance (i.e., right  
384 vs. left arm/hand), to understand the noise level during different levels of motor intent. Note, for each  
385 type of motor segment (i.e., forward vs. backward), and for each dominance side (i.e., dominant vs.  
386 non-dominant), more than 2500 spike amplitude data were extracted. These spike amplitude data  
387 were then plotted on a frequency histogram using Freedman-Diaconis binning rule [43]. They were  
388 used for empirical estimation of the best PDF in an MLE sense. The results yielded the Gamma  
389 probability distribution function (PDF) (see Figure A2 B).

390 Connectivity analyses on temporal aspects of coordination involved the linear speed from each  
391 pair of body parts. We computed pairwise cross-correlations to derive an adjacency matrix that  
392 would represent a weighted undirected graph. Here, the  $ij$ -link's weight is the maximum cross-  
393 correlation value between nodes  $i$  and  $j$  (that is, the corresponding two body parts). From these  
394 matrices, we computed clustering coefficients, which are measures that characterize the local  
395 connectivity (i.e., functional segregation). They would represent self-emerging kinematic synergies.  
396 Specifically, the degree of a node in the network (number of links at a node) between a set of nodes  
397 form triangles, and the fraction of triangle numbers formed around each node is known as the  
398 clustering coefficient (Figure 4G-J). This measure essentially reflects the proportion of the node's  
399 neighbors (i.e., nodes that are one degree away from the node of interest) that are also neighbors of  
400 each other [44]. Here, we computed the average intensity (geometric mean) of all triangles associated  
401 with each node, where the triangles reflect the degree strength, and is computed as shown below  
402 (using an algorithm by [45]; Eq 2).

$$403 \quad C_i = \sum_{i \in N} \frac{t_i}{k_i(k_i-1)} \quad (2)$$

404  $N$ : set of all nodes (composed of 10 body parts)

405  $C_i$ : cluster coefficient for node  $i$  ( $i \in N$ )

406  $t_i$ : geometric mean of triangles links formed around node  $i$  ( $i \in N$ )

407  $k_i$ : number of degrees (links) formed around node  $i$  ( $i \in N$ )

408 To visualize the network, we represented the median pair-wise cross-correlation values as the  
409 edge thickness, and median cluster coefficient values as the node size (Figure 4K). The median cross-  
410 correlation and cluster coefficient values were then compared between different movement segments  
411 (i.e., forward vs. backward ) and different hand dominance (i.e., right vs. left arm/hand), to  
412 understand how linear correlations differed across varying levels of motor control.  
413

#### 414 2.4. Data analysis on kinematics-heart network connectivity

415 As with the kinematics connectivity analysis, we segmented the data of the filtered EKG data along  
416 with the kinematics data by the time intervals when the dominant hand was making a deliberate  
417 forward motion and a spontaneous backward motion. (Figure 5A).

418 For the spatial domain of connectivity, we took the segmented data of angular acceleration and  
419 EKG data, and extracted MMS from both signals, and plotted a histogram of the MMS. Because the  
420 MMS of EKG signals did not follow a Gamma distribution, in order to assess the connectivity between  
421 the two, we computed the earth mover's distance (EMD) between the histogram from a single body  
422 part and from the EKG data (Figure 5A-D).



423

424

425

426

427

428

429

430

431

432

433

434

435

436

437

438

439

440

441

442

443

444

445

446

447

448

449

450

**Figure 4. Analytical pipeline and visualization methods for the kinematics network. (A)** Representative movement trajectory of the dominant hand during a pointing motion to a target (denoted by a small open circle). Each trial comprised of a forward-deliberate (red) and backward-spontaneous (blue) segment. These could be automatically separated by the speed and distance criteria (see Figure A2). **(B)** Time series of angular acceleration of the dominant hand's index finger during a typical pointing task. To examine kinematics-based connectivity, we used the angular acceleration time series, focusing on the moment by moment fluctuations in waveform amplitude. Here, peaks (maxima) and valleys (minima) are shown in red and black dots, respectively. The inset shows a zoomed-in picture of a single angular acceleration segment (i.e., two local minima and a single peak in between, used for standardization described in Eq 1). **(C)** Pairwise absolute difference in waveform was obtained and standardized using Eq 1. The resulting waveform provided the input to obtain MMS. **(D)** MMS train scaling the waveform amplitude for a typical pointing task. All standardized spike amplitude values from (B) and (C) were maintained, while all non-spike values were set to 0. **(E)** Frequency histogram of MMS amplitudes fitted to a Gamma PDF using MLE. **(F)** The empirically estimated Gamma parameters (shape and scale) were obtained and plotted on a Gamma parameter plane, with marker lines representing the 95% confidence interval. Noise-to-signal ratio (NSR) (i.e., fitted Gamma scale parameter) were later used for comparison between motor segments and dominance side. **(G)** Representative time series of linear speed of the dominant hand's index finger in one trial. **(H)** Pairwise cross-correlation between two body parts. **(I)** Adjacency matrix obtained from all pairwise maximal cross-correlation across all body parts under consideration, to represent a weighted undirected graph. **(J)** Connectivity metrics (e.g. clustering coefficient) were used to quantify patterns of temporal dynamics. **(K)** Network connectivity analyses to unveil self-emerging clusters, where nodes correspond to each body part. For the spatial domain, NSR derived from MMS amplitudes of angular accelerations were visualized as node size, and NSR derived from MMS amplitudes of pairwise absolute difference in angular acceleration as edge thickness. For the temporal domain, cluster coefficients were visualized as node size, and median cross-correlations as edge thickness.

451

452

453

454

455

456

For the temporal domain, we computed pairwise cross-correlations along with its lag, between the EKG filtered time series and each body part's linear velocity time series. In fact, in our analysis, we found an interesting pattern in directionality (i.e., lag) of correlation, and deemed informative to present them in the network graph. For that reason, edge thickness was represented by the median cross-correlation values, and color of the edges were visualized, where red would indicate EKG signals leading linear velocity signals, and blue would indicate linear velocity leading EKG signals (Figure 5G).

457 For all these metrics, we compared the medians between different movement segments (i.e.,  
458 forward vs. backward) and different hand dominance (i.e., right vs. left arm/hand), to understand how  
459 stochasticity and temporal dynamics changed across varying levels of motor intent between the heart  
460 (from ANS) and kinematics (from PNS/CNS).



461  
462 **Figure 5. Analytical pipeline and visualization methods for the kinematics-heart network. (A)**  
463 Typical movement trajectory of the dominant hand position, while performing a single pointing  
464 action towards a target. Each trajectory was separated into forward-deliberate (red) and backward-  
465 spontaneous segments (blue) according to hand-target updated distance and near-zero-speed value  
466 (see Figure A2 for details). **(B)** Angular acceleration time series of the hand during a typical pointing  
467 task. MMS amplitudes from the angular acceleration time series were extracted for each body part. **(C)**  
468 Filtered EKG time series during a pointing task. MMS amplitudes from the filtered EKG time series  
469 were extracted. **(D)** Histograms of compiled MMS amplitudes. For spatial analysis, pairwise EMD  
470 was computed between histograms from each body part and heart activity. **(E)** Linear speed time  
471 series of the dominant hand. For temporal analysis, linear speed kinematics time series was used. **(F)**  
472 Cross-correlation between a single body part's linear speed and filtered EKG signal. For each trial,  
473 cross-correlation was computed between a pair of filtered EKG and a single body part's linear speed  
474 time series, and the maximal value (red dot) and its corresponding lag values were  
475 extracted. **(G)** Visualization of connectivity. Network connectivity was visualized, where node size  
476 represented the EMD between the corresponding pair of body part and heart signals (i.e., spatial  
477 metric), and edge thickness represented the median cross-correlation values between the signal pairs  
478 (i.e., temporal metric). The edge colors were visualized, such that red would indicate EKG signals  
479 temporally leading linear speed signals, and blue would indicate linear speed leading EKG signals.

### 480 3. Results

#### 481 3.1. Higher Motor Intent Results in Higher NSR in Spatial Parameters

482 Motor intent in the context of our experimental assay specifically refers to the level of  
483 deliberateness (or spontaneity) of the movement segment in route to an external target (away from  
484 it). An instructed pointing action to touch the target is a goal-directed reach with high level of intent.  
485 In contrast, the uninstructed spontaneous retraction away from the target carries lower motor intent  
486 than the goal-directed one.

487 As a first set of analysis, the MMS extracted from the angular acceleration data from each body  
488 part were aggregated across all trials and conditions, and arranged by different movement segments  
489 (forward-deliberate vs. backward-spontaneous) and different dominance side. The same was also  
490 done on the MMS extracted from the absolute difference in angular acceleration from all pairs of body

491 parts. The NSR was found to be significantly higher when the motions were deliberate and on the  
492 dominant side. (Figure 6).

493 Specifically, NSRs of the kinematics time series from each body part showed was highest when  
494 an individual exerted higher motor control under higher level of motor intent, such as on the  
495 dominant side of the body and during a forward-deliberate motion. Conversely, when an individual  
496 did not deliberately intend to move the arm, as exhibited on the non-dominant side and during a  
497 backward-spontaneous motion, the NSR was at its lowest. The NSRs for all pairs of body parts'  
498 absolute difference in angular acceleration (i.e., change in distance between the pairs of body parts),  
499 on the other hand, is higher on the dominant side (vs. non-dominant side), but does not show such  
500 consistent pattern when comparing between the two motion segments (forward vs. backward).  
501 Details of the 95% confidence interval of the fitted Gamma scale parameter (i.e., the NSR) for all  
502 participants, and for all body parts (Figure A3) and all pairs of body parts (Figure A4) can be found  
503 in the Appendix.



504

505 **Figure 6. NSR signatures during pointing can differentiate the levels of intent.** Comparison  
506 includes forward-deliberate *vs.* backward-spontaneous segments and dominant *vs.* non-dominant  
507 effector. (A) Network visualization of a right-handed representative participant. Node size is  
508 represented by the NSR derived from the corresponding body part's kinematics time series, and edge  
509 thickness is represented by the NSR of the absolute difference in kinematics between the  
510 corresponding pairs of body parts. Node size and edge thickness are graphed in the same scale across  
511 different movement segments (i.e., forward and backward segments). (B) NSR for different  
512 movement segment and dominance side. Each dot is the median NSR values for each participant's  
513 different movement segments (left) and dominance side (right) from the unitless MMS derived from  
514 the Angular Acceleration (AA) fluctuations in amplitude. The x-axis denotes the NSR from individual  
515 body part's kinematics (NSR AA) and y-axis denotes the NSR from the MMS derived from the  
516 absolute pairwise body parts' difference (NSR AA Diff). Generally, for the former (NSR AA) measure,  
517 NSR is higher during a forward segment (F; red) than during a backward segment (B; blue), and on  
518 the dominant side (D; pink) than on the non-dominant side (ND; cyan). (C) NSR difference between  
519 dominant *vs.* non-dominant side. Left panel shows the NSR median difference between the dominant  
520 and non-dominant side for each participant, denoted as a single marker. Right panel shows the NSR  
521 median difference between the dominant and non-dominant side for the forward motion (F; red) and  
522 backward motion (B; blue). When the difference between the dominant and non-dominant side is  
523 examined separately for each motion segment, the NSR AA difference is wider during forward  
524 motion segments (F; red) than during backward motion segments (B; blue). (D) NSR difference  
525 between forward *vs.* backward movement segment. Left panel shows the NSR median difference  
526 between the forward and backward motion segments for each participant, denoted as a single marker.  
527 Color scheme as in (B).

528

529

530 3.2. Higher Motor Intent Results in Higher Cross-correlations and Clustering of Temporal Parameters

531 We used the MATLAB Network Connectivity toolbox [26] and examined the adjacency matrix  
532 derived from the pairwise maximal cross-correlation coefficient based on the time series of linear  
533 speed values. The clustering coefficient (CC) was obtained for each body part as a metric of functional  
534 segregation. For analysis, we examined the median cross-correlation values as a function of the CC  
535 values. Here we found that higher level of motor intent (i.e. during forward-deliberate motion  
536 performed with the dominant hand) resulted in a tendency of increased CC and increased median  
537 cross-correlation values (Figure 7).

538 When we compared between different motion segments, median cross-correlations were higher  
539 for forward motions than for backward ones for all but two participants. When we compared between  
540 different dominance side, all participants showed higher correlation on the dominant side than the  
541 non-dominant one. The median CC showed to be higher for forward motions than for backward  
542 segments for all participants, and higher for the dominant side than the non-dominant side for all but  
543 two participants. For all participants, both measures showed statistical significance in their difference  
544 (see Table A1 of Appendix for detailed statistical results).



545

546 **Figure 7. Network connectivity metric (cluster coefficient) and median cross-correlation**  
547 **differentiates between levels of intent. (A)** Network visualization of a representative right-handed  
548 participant. Cross-correlation is represented by the line weight and cluster coefficient (CC) by the  
549 node size, during forward (left) and backward movement segment (right). **(B)** Median cross-  
550 correlation (y-axis; Xcorr) and CC (x-axis) of linear speed for each participant's movement segment  
551 (left) and dominance side (right). Forward motions (red) and dominant side (pink) exhibits higher  
552 cross-correlation and CC values, than backward segments (blue) and non-dominant side (cyan). **(C)**  
553 Median cross-correlation and CC difference for different movement segments (left) and dominance  
554 side (right). Each participant's data is denoted as a single marker. Higher motor intent tends to show  
555 higher cross-correlation and CC values.

556 The distinctions that we observe from these findings, on how different levels of motor intent  
557 have separable network connectivity patterns based on temporal aspects of the kinematics data, are  
558 consistent with the patterns uncovered using spatial aspects of the kinematics data. Specifically, when  
559 we exert higher intent on our body, regardless of the physical trajectory of the motion, there is a  
560 stronger connectivity across our body parts. However, we note that this pattern is not as uniform  
561 across all participants, as we had found in the spatial aspect of the network analysis.

562

563 3.3. Kinematics and EKG (heart) Signals Show Larger Stochastic Differences for Higher Motor Intent and  
564 Control

565 To assess patterns of connectivity between biophysical signals derived from voluntary and  
566 autonomic levels of motor control we examined the kinematics (generated by the CNS-PNS) and the  
567 heart activity (generated by the ANS). The patterns of MMS stochasticity and temporal correlation  
568 across these systems distinguished levels of motor intent and control.

569 The analyses involving EKG and kinematics revealed larger stochastic differences in MMS data  
570 when higher motor intent and control are exerted. More precisely, the pairwise EMD showed higher  
571 differentiation between these two signals in all but one participant when forward motion was made,  
572 but only on the dominant side of the body. Furthermore, all but two participants showed higher EMD  
573 on the dominant side of the body, but only during forward motions. On the other hand, however,  
574 when backward motion is made, we find an opposite pattern, where all participants show higher EMD  
575 on the non-dominant side. We infer that there may be a modulating factor that underlies the  
576 stochastic relation between kinematics and heart signals.

577 When we examine the temporal relations between the two signals, by computing pair-wise  
578 cross-correlations, we see higher cross-correlations when there is lower motor intent across all  
579 participants – that is, during backward motions, and on the non-dominant side. Here we note the low  
580 range of the correlation coefficient values, around 0.1. However, we see a similar trend when this is  
581 based on the non-filtered raw EKG data, with a higher range around 0.6.

582 3.4. EKG Leads Kinematics Under Higher Motor Intent, But Opposite Pattern Emerges in Spontaneous  
583 Motions Requiring Less Motor Intent

584 We also examined the lag values to assess which signal leads the other. We found that motions  
585 under higher motor intent (i.e., during forward-deliberate motions performed with the dominant side  
586 of the arm), EKG signals tend to lead the kinematics signal. On the other hand, in movements  
587 performed under lower intent (i.e., during backward-spontaneous motion, and on the non-dominant  
588 side of the arm), kinematics signals tend to lead the EKG signals. This is depicted in Figure 8.



589

590 **Figure 8. Differentiation of spatial and temporal connectivity within the kinematics-heart network**  
591 **according to levels of motor intent. (A)** Network visualization of a right-handed representative  
592 participant. 1/EMD is represented by the node size, and median correlation is represented by the line  
593 weight. The color of edges indicates the temporal directionality between signals, where red indicates  
594 that heart leads the body linear speed and blue indicates that body linear speed leads the heart signals.  
595 **(B)** Median EMD (z-axis) and correlation (x-axis) and lag (y-axis) for each participant's movement  
596 segment (left) and dominance side (right). There is an overall pattern where higher motor intent  
597 (denoted by red for forward motions, and pink for dominant side) is exhibited by lower correlations  
598 and EKG leading the kinematics signal (i.e., lag is positive value). **(C)** Median EMD, correlation, and

599 lag difference for different dominance side (left), and this difference separated by movement segment  
 600 (right). We find a pattern where pairwise EMD show higher differentiation under higher motor intent  
 601 on the dominant side, but only when forward motion was made. **(D)** Median EMD, correlation, and  
 602 lag difference for different movement segments (left), and this difference separated by dominance  
 603 side (right). We find a pattern where pairwise EMD show higher differentiation under lower motor  
 604 intent on the non-dominant side, but only when the backward motion was made.

605 We caveat that that because the EKG device and motion capture system was not exactly  
 606 synchronized, the absolute lag value may not be as meaningful. Nevertheless, as we analyze these  
 607 data in terms of the difference (i.e., the delta lag values between forward and backward motions, and  
 608 between dominant and non-dominant sides), it is indeed meaningful to find such patterns uniformly  
 609 across all participants.

610 Table 1 summarizes the results that we showed in the sections above. We emphasize that  
 611 although we examined a small number of 8 participants, each individual's data is composed of a  
 612 significant amount of data points with unique non-Gaussian stochastic characteristics. For that  
 613 reason, instead of presenting the results with NHST (null hypothesis significant tests), we presented  
 614 the results by comparing the median difference between data points from different levels of intent,  
 615 for each individual.

616 **Table 1.** Summary of the connectivity results, where symbols<sup>1</sup> are shown to indicate which category  
 617 shows higher values.

|          |                     | Kinematics (AA) Network       |          |                           |                    |
|----------|---------------------|-------------------------------|----------|---------------------------|--------------------|
|          |                     | Forward                       | Backward | Dominant                  | Non-Dominant       |
| Spatial  | NSR AA              | o                             |          | o                         |                    |
|          | NSR AA Diff         |                               |          | o                         |                    |
| Temporal | Cross-Correlation   | $\Delta$                      |          | o                         |                    |
|          | Cluster Coefficient | o                             |          | $\Delta$                  |                    |
|          |                     | Kinematics (LS)-Heart Network |          |                           |                    |
|          |                     | Forward                       | Backward | Dominant                  | Non-Dominant       |
| Spatial  | EMD                 | $\Delta$ (D) <sup>2</sup>     | -        | $\Delta$ (F) <sup>3</sup> | o (B) <sup>4</sup> |
| Temporal | Cross-Correlation   |                               | $\Delta$ |                           | o                  |
|          | Lead* <sup>5</sup>  | EKG                           | LS       | EKG                       | LS                 |

618 <sup>1</sup> o indicates that it is higher for every participant;  $\Delta$  indicates that it is higher for most participants

619 <sup>2</sup> Forward-deliberate motions have higher EMD only on the dominant (D) side

620 <sup>3</sup> Dominant side has higher EMD only during forward-deliberate (F) motions

621 <sup>4</sup> Non-dominant side has higher EMD only during backward-spontaneous (B) motions

622 <sup>5</sup> Lead\* shows which signal leads between the 2 signals

#### 623 4. Discussion

624 This paper examined elements of the construct of agency from the embodied cognition  
 625 framework and dissected several layers of neuromotor control contributing to the sense of action  
 626 ownership. These layers, defined along a phylogenetically orderly taxonomy of maturation, follow a  
 627 higher-to-lower gradient of intent, from voluntary, to involuntary, to autonomic signals. At the  
 628 voluntary level, we followed the deliberate and the spontaneous segments of the target-directed  
 629 pointing act, positing that they could differentiate between levels of intent and as such, delineate  
 630 from the fluctuations in their biorhythmic activity, when a given movement segment was deliberately  
 631 performed with intent vs. when the segment happened spontaneously without instruction. This

632 differentiation is important to distinguish the sensory consequences of voluntary acts from those of  
633 acts that are not intended, or that occur autonomically. The sensory consequences of the latter are not  
634 currently studied, yet they seem important to complement von Holst's and Mittelstaedt's principle  
635 of reafference -as we know it today [19].

636 Our initial thought was that autonomic systems contributing to our brain's autonomy over the  
637 body and to our overall embodied sense of agency would remain impervious to stochastic shifts at  
638 the voluntary levels. We reasoned that given the vital role of these systems for survival, their robust  
639 signal would not reflect subtle changes in levels of intent, motor awareness and voluntary control.  
640 As such, our guess was that if during voluntary movements, there were stochastic differences  
641 between deliberate and spontaneous segments of the reach, or between dominant and non-dominant  
642 sides of the body, such shifts in patterns of variability would not be appreciable in the heart signals'  
643 fluctuations. Our guess was altogether wrong. Not only were the heart signals' differences  
644 quantifiable at the level of fluctuations in signal amplitude; these differences were appreciable as well  
645 in the inter-dynamics of the kinematics and cardiac signals.

646 We found that when movements are intended and deliberately performed to attain the goal  
647 defined by an external (visual) target, the heart signal leads the movement kinematics signal. Yet,  
648 when these overt movements are spontaneous in nature, i.e. uninstructed and not pursuing the  
649 completion of a specific externally defined task goal, the heart signal lags the movement kinematics  
650 signal. Across spatial and temporal parameters, we found consistent trends and confirmed the trends  
651 through different parameters. Indeed, deliberate motions, performed with the dominant effector,  
652 carry higher levels of NSR, denoting higher fluctuations away from the empirically estimated mean.

653 We interpret these findings considering the principle of reafference [46]. Furthermore, we  
654 discuss the possible contributions of these self-generated signals to the self-emergence of cognitive  
655 agency from motor agency, namely, the sense that one can physically realize what one mentally  
656 intends to do, confirm the consequences (both intended and unintended) and as such own the action.

657 Von Holst and Mittelstaedt studied the complexities of reafference across the nervous systems  
658 in the 1950s. They tried to capture the inherent recursiveness that relates movements and their  
659 sensations as they flow within closed feedback loops between the external and the internal  
660 environments of the organism. They wrote, "Voluntary movements show themselves to be  
661 dependent on the returning stream of afference which they themselves cause." And undeniably,  
662 feedback from voluntary movements currently play an important role in theoretical motor control,  
663 particularly within the framework of internal models for action [21, 47, 48] and more recent models  
664 of stochastic feedback control [49, 50]. Central to all these conceptualizations of the control problem  
665 has been the notion of anticipating the sensory consequences of impending intended actions.  
666 Nevertheless, nothing has been said about the consequences of action segments that bear a lower  
667 level of intent, that occur spontaneously, or that are altogether occurring autonomously. Modelers  
668 and experimenters in motor control do not seem to be aware of the former (although see [11, 12, 51])  
669 and the latter are assumed to be far removed from cognitive processes (although see [13] more  
670 recently.) Yet, unintended consequences from the spontaneous segments of the voluntary action seem  
671 as important as those sensory consequences that result from the deliberate segments. They may serve  
672 to inform learning new tasks, adapting to new environmental conditions or situations and more  
673 generally, they may play a role as a surprise factor to aid propel curiosity and / or to stimulate  
674 creative, exploratory thinking. They may help make our "invisible" automatic movements visible to  
675 the conscious brain performing them, and/or to the external observer tracking our behaviors.

676 Neither these models, nor Von Holst's work considered the contributions of unintended  
677 consequences from spontaneous acts quantifiable at different anatomical and physiological layers of  
678 the nervous systems, while trying to model the basic problem that the organism faces, i.e. the paradox  
679 of understanding the "self", which entails parsing out external from internal reafference [52]. Without  
680 a unifying framework to quantify these multilayered interactions and their contributions to the  
681 emergence of the notion of self, it becomes rather challenging to bridge the cognitive sense of agency,  
682 and more basically of action ownership, "I can do this!; It's me who's doing this!" with the type of  
683 autonomous motor control that enables successful completion of the intended act. We argue that

684 inclusion of the unintended consequences from overt spontaneous motions and autonomic signals in  
685 our models of motor control will help define embodied agency and provide a new framework to  
686 objectively quantify it.

687 The present work provides empirical evidence that (1) different levels of cognitive intent,  
688 awareness and control are indeed embodied and quantifiable in natural, unconstrained movements  
689 and (2) there are important contributions to central cognitive control quantifiable at the periphery in  
690 spontaneous segments of our motions and their consequences, but also in motions from supporting  
691 (non-dominant) body parts. Importantly, such differentiating contributions are also present in  
692 patterns from signals generated by the autonomic nervous systems. These aspects of the motor  
693 control problem are not considered at present in any of the mathematical and computational  
694 frameworks used to model the human brain, despite a body of empirical data differentiating classes  
695 of movements that are less sensitive to changes in dynamics [11, 16, 22-27] from those which are  
696 dynamic dependent [11, 12].

697 Our work augments Von Holst's and Mittelstaedt's principle of reafference nontrivially by  
698 including reafferent contributions from other layers of the nervous systems (Figure 1A) and  
699 highlighting the need to update our conceptualization of internal models for action [52]. In the past,  
700 the literature has focused on voluntary control and goal-directed behavior to define and to  
701 characterize agency [4, 9, 10, 53]. However, if new generations of AI models aim to attain artificial  
702 autonomous agents with real agency, it may be necessary to reformulate our models and  
703 reconceptualize our experiments in embodied cognition to encompass these multiple layers of intent,  
704 awareness and motor function.

705 An area of importance in this regard is smart health and AI, connecting digital biomarkers with  
706 clinical observational criteria (e.g. [54].) In the clinical world, there are many problems that will  
707 require to be mindful of this intended vs. unintended dichotomy, as there are phenomena that occurs  
708 spontaneously and is difficult to model within the voluntary reafference framework. The type of  
709 reafference that we need to model those problems belongs in the realm of self-emerging behaviors.  
710 Among these are sudden freezing of gait in Parkinson's disease, leading to the loss of balance and  
711 occasional falls; seizures across a broad range of disorders; heart attacks; a subset of repetitive  
712 behaviors and self-injurious or aggressive episodes in autism, among others. All these episodes have  
713 in common the element of surprise connected to their spontaneity. No algorithm relying exclusively  
714 on intentional control signals can appropriately capture the essence of these phenomena. To properly  
715 characterize it, forecast it and quickly detect it, we need veridical generative models that understand  
716 the differences between the consequences of something that was intended and under voluntary  
717 control, something that spontaneously happened, and something that happens autonomically, with  
718 high accuracy. We do not have autonomous robots with embodied agency yet, because their staged  
719 motions are mostly pre-programmed. These programs may only mimic the predictive consequences  
720 of voluntary actions. Self-correcting robotic systems where such behaviors spontaneously self-  
721 emerge, are less common. It is perhaps self-emerging awareness derived from the consequences of  
722 spontaneous and autonomic phenomena that makes our embodied agency a special human trait  
723 contributing to intelligent control. This type of control combining deliberate and spontaneous acts,  
724 may produce solutions that are capable of generalizing from a small set of specific situations; transfer  
725 the learning from one context to another (using contextual variations) and retain robustness to  
726 potential interference from new situations in unknown contexts. In future research, it will be  
727 important to understand how the type of differentiation that we discovered here, paired with  
728 externally vs. internally generated rewards, may contribute to the fast or slow acquisition of  
729 memories from transient acts vs. memories from systematic periodic repetitions of those acts.

730 Here we offer a unifying framework with a taxonomy of function and differentiable levels of  
731 intent, awareness and control paired with a new statistical platform for personalized analyses of  
732 natural behaviors. This new model aims to capture and characterize the micro-fluctuations in the  
733 gross data of our biorhythms that traditional approaches throw away as noise through grand  
734 averaging and "one size fits all" methods. Our approach allows integration of multilayered  
735 hierarchical signals and provides the means to differentiate re-entrant contributions from

736 multilayered exo- and endo-afference. This can help our self-realization of embodied agency as the  
737 spontaneous transformation of mental intent into physical volition. We invite the reader to consider  
738 this new model for embodied cognition and offer novel avenues to bridge the currently disconnected  
739 fields of motor control and cognitive phenomena.

740 **Author Contributions:** Conceptualization, J.R. and E.B.T.; methodology, J.R. and E.B.T.; formal analysis, J.R. and  
741 E.B.T.; investigation, J.R. and E.B.T.; writing—original draft preparation, J.R. and E.B.T.; writing—review and  
742 editing, J.R. and E.B.T.; visualization, J.R. and E.B.T.; supervision, E.B.T.; funding acquisition, E.B.T. All authors  
743 have read and agreed to the published version of the manuscript.

744 **Funding:** This research was funded by New Jersey Governor’s Council for the Medical Research and Treatments  
745 of Autism CAUT17BSP024 and by the Nancy Lurie Marks Family Foundation to E.B.T. Career Development  
746 Award.

747 **Conflicts of Interest:** The authors declare no conflict of interest.

## 748 Appendix A



749

750 **Figure A1.** Fourier power spectrum of linear speed and EKG and filtered EKG signals extracted from  
751 60 trials of pointing motion (i.e., 300 seconds).



752

753

754

755

756

757

758

759

760

761

762

763

764

765

766

767

768

**Figure A2.** (A) Speed profile of a typical pointing motion. During a single pointing motion, a typical speed profile of linear speed, angular speed, linear acceleration, and angular acceleration are exhibited as such. Because angular acceleration shows to have the largest number of peaks during a single pointing motion, we decided to examine this kinematic waveform, as this would provide the highest statistical power for the MLE process. Note, linear speed data was used to extract the timing that would separate the start and end time of a forward-deliberate motion (shown in red) and of a backward-spontaneous motion (shown in blue arrow). This was done by finding the timepoint when instantaneous zero linear speed occurs, since this indicates the moment the index finger reaches target. (B) Maximum likelihood estimated values for the corresponding histogram on top of each graph. The horizontal axis contains the value of the gradient at the end of the optimization process, and the vertical axis contains the maximum likelihood estimation (MLE) value for the Gamma, normal, exponential and lognormal distributions. Overall, we found that the Gamma and lognormal distributions have a good fit to these kinematics data. However, because Gamma distributions have shown to be a better fit to the kinematics data from individuals with neurological disorders than lognormal distributions, for consistency, we chose to use the Gamma probability distribution for fitting purpose.



769

770

771

772

773

774

775

776

777

778

779

**Figure A3. Fitted Gamma scale parameter (i.e., NSR) 95% confidence interval for a single body part's kinematics data.** The 95% confidence interval is plotted for all eight participants (P1 to P8). Each row represents a single body part: under the "All body" category shows all 10 body parts during forward (red) and backward (blue) motions; under the "D (dominant)" category shows the 4 body parts from the dominant side of the arm; under the "ND (non-dominant)" category shows the 4 body parts from the non-dominant side of the arm; under the "All seg (all segment)" category shows the 4 body parts on the dominant (pink) and non-dominant (cyan) side during the entire pointing motion; under the "F (forward)" category shows the 4 body parts on both D and ND side during forward motion; and under the "B (backward)" category shows the 4 body parts on both D and ND side during backward motion.



780

781

782

**Figure A4. Fitted Gamma scale parameter (i.e., NSR) 95% confidence interval from the absolute difference in kinematics between pairs of body parts.** The 95% confidence interval is plotted for all

783 eight participants (P1 to P8). Each row represents a pair of body part: under the “All body” category  
 784 shows all 45 body part ( $_{10}C_2$ ) pairs during forward (red) and backward (blue) motions; under the “D  
 785 (dominant)” category shows the 6 body part pairs ( $_4C_2$ ) from the dominant side of the arm; under the  
 786 “ND (non-dominant)” category shows the 6 body parts pairs ( $_4C_2$ ) from the non-dominant side of the  
 787 arm; under the “All seg (all segment)” category shows the 6 body parts pairs ( $_4C_2$ ) on the dominant  
 788 (pink) and non-dominant (cyan) side during the entire pointing motion; under the “F (forward)”  
 789 category shows the 6 body parts pairs ( $_4C_2$ ) on both D and ND side during forward motion; and under  
 790 the “B (backward)” category shows the 4 body parts on both D and ND side during backward motion.



791

792 **Figure A5. Different viewpoints of the 3D graphs in Figure 8. (A)** Different viewpoint of graphs in  
 793 Figure 8B. **(B)** Different viewpoints of graphs in Figure 8C (left) and Figure 8D (right).

794

795 **Table A1.** Kolmogorov-Smirnov test statistics (KS-stat) and their p-values (p) on cluster coefficients  
 796 comparison (left) and cross-correlation (right) between different movement segments (forward (F) vs.  
 797 backward (B)) and dominance side (dominant (D) vs. non-dominant (ND))<sup>1</sup>

| Cluster Coefficient |         |         |          |         | Cross-Correlation |         |         |          |         |
|---------------------|---------|---------|----------|---------|-------------------|---------|---------|----------|---------|
| Subject             | F vs. B |         | D vs. ND |         | Subject           | F vs. B |         | D vs. ND |         |
| ID                  | KS-stat | p       | KS-stat  | p       | ID                | KS-stat | p       | KS-stat  | p       |
| P01                 | 0.29    | <0.01** | 0.16     | <0.01** | P01               | 0.14    | <0.01** | 0.40     | <0.01** |
| P02                 | 0.55    | <0.01** | 0.57     | <0.01** | P02               | 0.55    | <0.01** | 0.57     | <0.01** |
| P03                 | 0.38    | <0.01** | 0.16     | <0.01** | P03               | 0.38    | <0.01** | 0.16     | <0.01** |
| P04                 | 0.09    | <0.01** | 0.09     | <0.01** | P04               | 0.09    | <0.01** | 0.09     | <0.01** |
| P05                 | 0.14    | <0.01** | 0.26     | <0.01** | P05               | 0.14    | <0.01** | 0.26     | <0.01** |
| P06                 | 0.17    | <0.01** | 0.28     | <0.01** | P06               | 0.17    | <0.01** | 0.28     | <0.01** |
| P07                 | 0.35    | <0.01** | 0.41     | <0.01** | P07               | 0.35    | <0.01** | 0.41     | <0.01** |
| P08                 | 0.13    | <0.01** | 0.35     | <0.01** | P08               | 0.13    | <0.01** | 0.35     | <0.01** |

798 <sup>1</sup>Note, the Kolmogorov-Smirnov test was used, as this test is appropriate for data that do not follow a Gaussian  
 799 distribution and has a large sample size (n>1000) that may yield low statistical power.

## 800 References

- 801 1. Maturana, H.R. and F.J. Varela, *Autopoiesis and cognition: The realization of the living*. Vol. 42. 1991:  
 802 Springer Science & Business Media.
- 803 2. Abrahamson, D. and R. Sanchez-Garcia, *Learning Is Moving in New Ways: The Ecological Dynamics of*  
 804 *Mathematics Education*. Journal of the Learning Sciences, 2016. **25**(2): p. 203-239.
- 805 3. Newen, A., *The Embodied Self, the Pattern Theory of Self, and the Predictive Mind*. Front Psychol, 2018. **9**: p.  
 806 2270.
- 807 4. David, N., A. Newen, and K. Voegley, *The "sense of agency" and its underlying cognitive and neural*  
 808 *mechanisms*. Conscious Cogn, 2008. **17**(2): p. 523-34.
- 809 5. Synofzik, M., G. Vosgerau, and A. Newen, *I move, therefore I am: a new theoretical framework to investigate*  
 810 *agency and ownership*. Conscious Cogn, 2008. **17**(2): p. 411-24.
- 811 6. Frith, C.D., *Action, agency and responsibility*. Neuropsychologia, 2014. **55**: p. 137-42.
- 812 7. Tsakiris, M., G. Prabhu, and P. Haggard, *Having a body versus moving your body: How agency structures*  
 813 *body-ownership*. Conscious Cogn, 2006. **15**(2): p. 423-32.
- 814 8. Tsakiris, M., et al., *Neural signatures of body ownership: a sensory network for bodily self-consciousness*. Cereb  
 815 *Cortex*, 2007. **17**(10): p. 2235-44.
- 816 9. Toni, I., D. Thoenissen, and K. Zilles, *Movement preparation and motor intention*. Neuroimage, 2001. **14**(1  
 817 Pt 2): p. S110-7.
- 818 10. Haggard, P. and A. Wing, *On the hand transport component of prehensile movements*. J Mot Behav, 1997.  
 819 **29**(3): p. 282-7.
- 820 11. Torres, E.B., *Two classes of movements in motor control*. Exp Brain Res, 2011. **215**(3-4): p. 269-83.
- 821 12. Torres, E.B., *Signatures of movement variability anticipate hand speed according to levels of intent*. Behav Brain  
 822 *Funct*, 2013. **9**: p. 10.
- 823 13. Ryu, J. and E.B. Torres, *Characterization of Sensory-Motor Behavior Under Cognitive Load Using a New*  
 824 *Statistical Platform for Studies of Embodied Cognition*. Front Hum Neurosci, 2018. **12**: p. 116.
- 825 14. Torres, E.B., et al., *Autism: the micro-movement perspective*. Front Integr Neurosci, 2013. **7**: p. 32.
- 826 15. Bernstein, N.A., *The Coordination and Regulation of Movements*. 1967, London: Pergamon Press.

- 827 16. Torres, E.B., Zipser, D., *Reaching to Grasp with a Multi-jointed Arm (I): A Computational Model*. Journal of  
828 Neurophysiology, 2002. **88**: p. 1-13.
- 829 17. Scholz, J., Schoner, G., *The uncontrolled manifold concept: Identifying control variables for a functional task*.  
830 Experimental Brain Research, 1999. **126**: p. 289-306.
- 831 18. Latash, M.L., J.P. Scholz, and G. Schoner, *Motor control strategies revealed in the structure of motor*  
832 *variability*. Exerc Sport Sci Rev, 2002. **30**(1): p. 26-31.
- 833 19. Von Holst E. and M. H., *The principle of reafference: Interactions between the central nervous system and the*  
834 *peripheral organs.*, in *Perceptual Processing: Stimulus equivalence and pattern recognition* e. Dodwell PC,  
835 Editor. 1950, Appleton-Century-Crofts: New York. p. 41-72.
- 836 20. Wolpert, D.M. and M. Kawato, *Multiple paired forward and inverse models for motor control*. Neural Netw,  
837 1998. **11**(7-8): p. 1317-29.
- 838 21. Kawato, M. and D. Wolpert, *Internal models for motor control*. Novartis Found Symp, 1998. **218**: p. 291-  
839 304; discussion 304-7.
- 840 22. Torres, E.B., *Theoretical Framework for the Study of Sensori-motor Integration.*, in *Cognitive Science*. 2001,  
841 University of California, San Diego: La Jolla. p. 115.
- 842 23. Nishikawa, K., S. Murray, and M. Flanders, *Do arm postures vary with the speed of reaching?* Journal of  
843 Neurophysiology, 1999. **81**(5): p. 2582-6.
- 844 24. Atkeson, C.G. and J.M. Hollerbach, *Kinematic features of unrestrained vertical arm movements*. J Neurosci,  
845 1985. **5**(9): p. 2318-30.
- 846 25. Torres, E.B., Zipser D., *Simultaneous control of hand displacements and rotations in orientation-matching*  
847 *experiments*. Journal of Applied Physiology, 2004. **96**(Highlighted Topic Neural Control of Movement):  
848 p. 1978-1987.
- 849 26. Torres, E.B., *New symmetry of intended curved reaches*. Behav Brain Funct, 2010. **6**: p. 21.
- 850 27. Torres, E. and R. Andersen, *Space-time separation during obstacle-avoidance learning in monkeys*. J  
851 Neurophysiol, 2006. **96**(5): p. 2613-32.
- 852 28. Kalampratsidou, V. and E.B. Torres, *Peripheral Network Connectivity Analyses for the Real-Time Tracking*  
853 *of Coupled Bodies in Motion*. Sensors (Basel), 2018. **18**(9).
- 854 29. Torres, E.B., K.M. Heilman, and H. Poizner, *Impaired endogenously evoked automated reaching in*  
855 *Parkinson's disease*. J Neurosci, 2011. **31**(49): p. 17848-63.
- 856 30. Yanovich, P., et al., *Spatial-orientation priming impedes rather than facilitates the spontaneous control of hand-*  
857 *retraction speeds in patients with Parkinson's disease*. PLoS One, 2013. **8**(7): p. e66757.
- 858 31. Torres, E.B., P. Yanovich, and D.N. Metaxas, *Give spontaneity and self-discovery a chance in ASD:*  
859 *spontaneous peripheral limb variability as a proxy to evoke centrally driven intentional acts*. Front Integr  
860 Neurosci, 2013. **7**: p. 46.
- 861 32. Torres, E.B., et al., *Toward Precision Psychiatry: Statistical Platform for the Personalized Characterization of*  
862 *Natural Behaviors*. Front Neurol, 2016. **7**: p. 8.
- 863 33. Torres, E.B., *Atypical signatures of motor variability found in an individual with ASD*. Neurocase, 2011. **19**(2):  
864 p. 150-65.
- 865 34. Mosimann, J.E., *Size allometry: size and shape variables with characterizations of the lognormal and generalized*  
866 *gamma distributions*. J. Am. Stat. Assoc., 1970. **65**: p. 930-945.
- 867 35. Lleonart, J., J. Salat, and G.J. Torres, *Removing allometric effects of body size in morphological analysis*. J  
868 Theor Biol, 2000. **205**(1): p. 85-93.

- 869 36. Monge, G., *Memoire sur la theorie des deblais et des remblais.* , in *Histoire de l' Academie Royale des Science;*  
870 *avec les Memoires de Mathematique et de Physique.* 1781, De L'imprimerie Royale: Paris, France.
- 871 37. Arjovsky, M., S. Chintala, and L. Bottou. *Wasserstein Generative Adversarial Networks.* in *Proceedings of the*  
872 *34th International Conference on Machine Learning.* 2017. Sydney, Australia.
- 873 38. Stolfi, J. and L.J. Guibas, *The earth mover's distance as a metric for image retrieval.* . *Int. J. Comput. Vis.,*  
874 2000. **40**: p. 99-121.
- 875 39. Rubner, Y., L.J. Guibas, and C. Tomasi. *The earth mover's distance, multi-dimensional scaling, and color-*  
876 *based image retrieval.* in *Proceedings of the ARPA image understanding workshop.* 1997.
- 877 40. McClelland, J. and D. Koslicki, *EMDUniFrac: exact linear time computation of the unifrac metric and*  
878 *identification of differentially abundant organisms.* *Journal of mathematical biology,* 2018. **77**(4): p. 935-949.  
879



A



B



C









A



B



C



D



**A****Forward****Backward****B****C**

**A****B****C****D**

Single-sided Amplitude Spectrum



A



B







NSR 95% confidence interval\*

**A****B**
